# Supplementary material for: The quality of economic evaluations of ultra-orphan drugs in Europe – a systematic review
Source: PubMed Central journal article supplement (PMC4520069; doi:10.1186/s13023-015-0305-y), 2015-07-30
Supplement: 13023_2015_305_MOESM1_ESM.pdf [file 13023_2015_305_MOESM1_ESM.pdf]

CHEC

|                                                                                                                     | Study           |                 |               |                |                   |               |                |             |               |                     |             |             |                 |                |                 |
|---------------------------------------------------------------------------------------------------------------------|-----------------|-----------------|---------------|----------------|-------------------|---------------|----------------|-------------|---------------|---------------------|-------------|-------------|-----------------|----------------|-----------------|
|                                                                                                                     | Rombach - Fabry | Connock - Fabry | Moore - Fabry | Dussen-Gaucher | Beutler - Gaucher | Kanters-Pompe | Castro - Pompe | Coyle - PNH | Connock - PNH | Soohoo - Cystinosis | Garin - PAH | Roman - PAH | Stevenson - PAH | Highland - PAH | Wodarczyk - PAH |
| 1. Is the study population clearly described?                                                                       | (+)             | (+)             | (+)           | (+)            | (+)               | (+)           | (+)            | (+)         | (+)           | (+)                 | (+)         | (+)         | (+)             | (+)            | (+)             |
| 2. Are competing alternatives clearly described?                                                                    | (+)             | (+)             | (-)           | (+)            | (+)               | (+)           | (+)            | (+)         | (+)           | (+)                 | (+)         | (+)         | (+)             | (+)            | (+)             |
| 3. Is a well-defined research question posed in answerable form?                                                    | (+)             | (+)             | (+)           | (+)            | (+)               | (+)           | (+)            | (+)         | (+)           | (+)                 | (+)         | (+)         | (+)             | (+)            | (+)             |
| 4. Is the economic study design appropriate to the stated objective?                                                | (+)             | (-)             | (-)           | (+)            | (-)               | (+)           | (+)            | (+)         | (-)           | (+)                 | (+)         | (+)         | (+)             | (+)            | (+)             |
| 5. Is the chosen time horizon appropriate to include relevant costs and consequences?                               | (+)             | (+)             | (-)           | (+)            | (-)               | (+)           | (+)            | (+)         | (-)           | (+)                 | (-)         | (-)         | (+)             | (-)            | (-)             |
| 6. Is the actual perspective chosen appropriate?                                                                    | (+)             | (-)             | (-)           | (+)            | (-)               | (+)           | (-)            | (-)         | (-)           | (+)                 | (-)         | (-)         | (-)             | (-)            | (-)             |
| 7. Are all important and relevant costs for each alternative identified?                                            | (+)             | (-)             | (-)           | (+)            | (-)               | (+)           | (+)            | (+)         | (-)           | (-)                 | (+)         | (+)         | (+)             | (+)            | (+)             |
| 8. Are all costs measured appropriately in physical units?                                                          | (+)             | (+)             | (-)           | (+)            | (-)               | (+)           | (+)            | (+)         | (-)           | (+)                 | (+)         | (+)         | (+)             | (+)            | (+)             |
| 9. Are costs valued appropriately?                                                                                  | (+)             | (+)             | (-)           | (+)            | (-)               | (+)           | (+)            | (+)         | (-)           | (+)                 | (+)         | (+)         | (+)             | (+)            | (+)             |
| 10. Are all important and relevant outcomes for each alternative identified?                                        | (+)             | (-)             | (-)           | (+)            | (-)               | (-)           | (-)            | (+)         | (-)           | (-)                 | (+)         | (+)         | (-)             | (+)            | (-)             |
| 11. Are all outcomes measured appropriately?                                                                        | (+)             | (-)             | (-)           | (+)            | (-)               | (+)           | (+)            | (+)         | (+)           | (+)                 | (+)         | (+)         | (+)             | (+)            | (+)             |
| 12. Are outcomes valued appropriately?                                                                              | (+)             | (+)             | (+)           | (+)            | (-)               | (+)           | (+)            | (+)         | (+)           | (-)                 | (+)         | (+)         | (+)             | (+)            | (-)             |
| 13. Is an incremental analysis of costs and outcomes of alternatives performed?                                     | (+)             | (+)             | (-)           | (+)            | (+)               | (+)           | (+)            | (+)         | (+)           | (+)                 | (+)         | (+)         | (+)             | (+)            | (+)             |
| 14. Are all future costs and outcomes discounted appropriately?                                                     | (+)             | (+)             | (-)           | (+)            | (+)               | (+)           | (+)            | (+)         | (-)           | (-)                 | N/A         | (+)         | (+)             | N/A            | (+)             |
| 15. Are all important variables, whose values are uncertain, appropriately subjected to sensitivity analysis?       | (+)             | (+)             | (+)           | (+)            | (-)               | (+)           | (+)            | (+)         | (-)           | (+)                 | (+)         | (+)         | (+)             | (+)            | (+)             |
| 16. Do the conclusions follow from the data reported?                                                               | (+)             | (+)             | (+)           | (+)            | (+)               | (+)           | (+)            | (+)         | (+)           | (+)                 | (+)         | (+)         | (+)             | (+)            | (+)             |
| 17. Does the study discuss the generalizability of the results to other settings and patient/client groups?         | (-)             | (+)             | (+)           | (+)            | (-)               | (-)           | (+)            | (-)         | (-)           | (+)                 | (+)         | (-)         | (-)             | (+)            | (+)             |
| 18. Does the article indicate that there is no potential conflict of interest of study researcher(s) and funder(s)? | (+)             | (-)             | (+)           | (+)            | (-)               | (+)           | (-)            | (+)         | (+)           | (+)                 | (+)         | (+)         | (-)             | (-)            | (+)             |
| 19. Are ethical and distributional issues discussed appropriately?                                                  | (+)             | (+)             | (+)           | (+)            | (+)               | (+)           | (+)            | (+)         | (-)           | (+)                 | N/A         | N/A         | N/A             | N/A            | N/A             |
| Total CHEC-List (/19)*                                                                                              | 18              | 13              | 8             | 19             | 7                 | 17            | 16             | 17          | 9             | 15                  | 15 (2)      | 15 (1)      | 14 (1)          | 14 (2)         | 14 (1)          |

\* The number of items that were not applicable from the CHEC-List appears in parentheses. For example, discounting (Item 14) is not applicable for studies with a follow up of 1 year or less.  
 (+) yes/ study paid sufficient attention to aspect; (-) no/ item not reported; N/A, item not applicable.
